# Supplementary material
Source: ML conference proceedings conference paper supplement (https://proceedings.neurips.cc/paper_files/paper/2024/hash/f26b29298ae8acd94bd7e839688e329b-Abstract.html)
Supplement: Supplementary file 1 [file f26b29298ae8acd94bd7e839688e329b-Supplemental-Datasets_and_Benchmarks_Track.pdf]

## 559 C IaC-Eval datasheet

560 We provide details on the IaC-Eval dataset published on HuggingFace, with a persistent DOI at  
561 <https://doi.org/10.57967/hf/2400>. Our Croissant metadata can be found in the same HuggingFace  
562 repository above. Additional information, and our evaluation benchmark can be found in our GitHub  
563 repository at <https://github.com/autoiac-project/iac-eval>.

### 564 C.1 Motivation

565 1. **For what purpose was the dataset created?** Was there a specific task in mind? Was there  
566 a specific gap that needed to be filled? Please provide a description.

567 The dataset and benchmark was created to enable the quantitative evaluation of large  
568 language model performance on generating Infrastructure-as-Code (IaC) programs. There  
569 currently exist many such datasets/benchmarks (e.g., HumanEval) that evaluate general  
570 code generation (e.g., Python code generation for HumanEval), but none are capable of  
571 evaluating IaC code generation. This enables future research in developing IaC-specific code  
572 generation techniques: we can use IaC-Eval to determine how effective these techniques are.

573 2. **Who created this dataset (e.g. which team, research group) and on behalf of which  
574 entity (e.g., company, institution, organization)?**

575 This dataset was primarily created by the authors from the University of Michigan, in  
576 collaboration with Myungjin Lee from Cisco Research.

577 3. **Who funded the creation of the dataset?** If there is an associated grant, please provide the  
578 name of the grant or and the grant name and number.)

579 This work is partially funded by Cisco and Amazon.

580 4. **Any other comments?**

581 No.

### 582 C.2 Composition

583 1. **What do the instances that comprise the dataset represent (e.g. documents, photos,  
584 people, countries)?** Are there multiple types of instances (e.g. movies, users, and ratings;  
585 people and interactions between them; nodes and edges)? Please provide a description.)

586 Each instance (row) of the dataset represents an IaC problem scenario that we use to evaluate  
587 LLMs on their IaC code generation capabilities. Each scenario essentially contains a user's  
588 natural language IaC problem description (e.g., creating an AWS compute node) and its  
589 associated infrastructure intent specification (that codifies precisely what the user's intention  
590 is). The former is fed to the LLM under evaluation, while the latter is used to verify that the  
591 LLM's generated program conforms to the user's intent. Our scenarios cover a variety of  
592 AWS services, and range from simple to challenging.

593 2. **How many instances are there in total (of each type, if appropriate)?**

594 We have 458 human-curated scenarios, with details provided in Sec. [3.2](#)

595 3. **Does the dataset contain all possible instances or is it a sample(not necessarily random)  
596 of instances from a larger set?** If the dataset is a sample, then what is the larger set? Is the  
597 sample representative of the larger set (e.g. geographic coverage)? If so, please describe  
598 how this representativeness was validated/verified. If it is not representative of the larger set,  
599 please describe why not (e.g., to cover a more diverse range of instances, because instances  
600 were withheld or unavailable.)

601 IaC-Eval is the first step in this research direction, and we cover a wide range of popular  
602 services within AWS. However, as alluded to in Sec. [1](#), the diversity of cloud services and  
603 providers makes it impractical, especially in the first work, to cover all possible scenarios.  
604 We hope our work will inspire and lead to future expansions to the dataset, whether it be  
605 human-curated or automated expansions.

- 606 4. **What data does each instance consist of?** ("Raw" data (e.g. unprocessed text or images)  
607 or features? In either case, please provide a description.)  
608 Each row in our dataset makes up an individual instance. The format of each row is described  
609 in Sec. [C.10](#)
- 610 5. **Is there a label or target associated with each instance?** If so, please provide a description.  
611 Each instance contains an infrastructure intent specification (as mentioned earlier) and an  
612 example reference output (which we envision could be useful in the future for fine-tuning  
613 purposes).
- 614 6. **Is any information missing from individual instances?** (If so, please provide a description,  
615 explaining why this information is missing (e.g., because it was unavailable). This does not  
616 include intentionally removed information, but might include, e.g., redacted text.)  
617 No.
- 618 7. **Are relationships between individual instances made explicit (e.g., users' movie ratings,  
619 social network links)?** (If so, please describe how these relationships are made explicit.)  
620 The instances are independent of each other.
- 621 8. **Are there recommended data splits (e.g., training, development/validation, testing)?** (If  
622 so, please provide a description of these splits, explaining the rationale behind them.)  
623 We leave the training, validation and testing splits to the discretion of the users themselves,  
624 depending on the downstream task the dataset is used for. With that being said, we currently  
625 envision the base dataset of IaC-Eval to be used for evaluation purposes, in which case all of  
626 the existing dataset would be used as a testing split.
- 627 9. **Are there any errors, sources of noise, or redundancies in the dataset?** (If so, please  
628 provide a description.)  
629 There could potentially be errors in our dataset. However, we are committed to the ongoing  
630 maintenance and preservation of the dataset, and this commitment includes addressing issues  
631 identified by the community after the dataset's release, with feedback monitored through  
632 GitHub or HuggingFace issue trackers.
- 633 10. **Is the dataset self-contained, or does it link to or otherwise rely on external resources  
634 (e.g., websites, tweets, other datasets)?** (If it links to or relies on external resources,  
635 a) are there guarantees that they will exist, and remain constant, over time; b) are there  
636 official archival versions of the complete dataset (i.e., including the external resources as  
637 they existed at the time the dataset was created); c) are there any restrictions (e.g., licenses,  
638 fees) associated with any of the external resources that might apply to a future user? Please  
639 provide descriptions of all external resources and any restrictions associated with them, as  
640 well as links or other access points, as appropriate.)  
641 Yes.
- 642 11. **Does the dataset contain data that might be considered confidential (e.g., data that is  
643 protected by legal privilege or by doctor-patient confidentiality, data that includes the  
644 content of individuals' non-public communications)?** (If so, please provide a description.)  
645 No.
- 646 12. **Does the dataset contain data that, if viewed directly, might be offensive, insulting,  
647 threatening, or might otherwise cause anxiety?** (If so, please describe why.)  
648 No.
- 649 13. **Does the dataset relate to people?** (If not, you may skip the remaining questions in this  
650 section.)  
651 No.
- 652 14. **Does the dataset identify any subpopulations (e.g., by age, gender)?** (If so, please  
653 describe how these sub-populations are identified and provide a description of their respective  
654 distributions within the dataset.)  
655 N/A.

- 656 15. **Is it possible to identify individuals (i.e., one or more natural persons), either directly**  
657 **or indirectly (i.e., in combination with other data) from the dataset?** (If so, please  
658 describe how.)  
659 N/A.
- 660 16. **Does the dataset contain data that might be considered sensitive in any way (e.g., data**  
661 **that reveals racial or ethnic origins, sexual orientations, religious beliefs, political**  
662 **opinions or union memberships, or locations; financial or health data; biometric or**  
663 **genetic data; forms of government identification, such as social security numbers;**  
664 **criminal history)?** (If so, please provide a description.)  
665 N/A.
- 666 17. **Any other comments?**  
667 No.

### 668 C.3 Collection process

- 669 1. **How was the data associated with each instance acquired?** (Was the data directly  
670 observable (e.g., raw text, movie ratings), reported by subjects (e.g., survey responses), or  
671 indirectly inferred/derived from other data (e.g., part-of-speech tags, model-based guesses  
672 for age or language)? If data was reported by subjects or indirectly inferred/derived from  
673 other data, was the data validated/verified? If so, please describe how.)  
674 Our data was collected by studying the associated cloud services and their use cases (e.g.,  
675 reading relevant documentations) and conducting deployments to ensure the scenarios were  
676 sound.
- 677 2. **What mechanisms or procedures were used to collect the data (e.g., hardware apparatus**  
678 **or sensor, manual human curation, software program, software API)?** (How were these  
679 mechanisms or procedures validated?)  
680 Our scenarios were crafted using deployments on an AWS account managed by our research  
681 group at the University of Michigan.
- 682 3. **If the dataset is a sample from a larger set, what was the sampling strategy (e.g.,**  
683 **deterministic, probabilistic with specific sampling probabilities)?**  
684 The dataset scenarios were selected to capture a wide variety of popular AWS services, since  
685 it is impractical to capture all possible cloud services from all cloud providers.
- 686 4. **Who was involved in the data collection process (e.g., students, crowd workers, con-**  
687 **tractors) and how were they compensated (e.g., how much were crowd workers paid)?**  
688 Data collection was done by the authors.
- 689 5. **Over what timeframe was the data collected?** (Does this timeframe match the creation  
690 timeframe of the data associated with the instances (e.g., recent crawl of old news articles)?  
691 If not, please describe the timeframe in which the data associated with the instances was  
692 created.)  
693 The dataset was created over the time period Sep 2023-May 2024.
- 694 6. **Were any ethical review processes conducted (e.g., by an institutional review board)?**  
695 (If so, please provide a description of these review processes, including the outcomes, as  
696 well as a link or other access point to any supporting documentation.)  
697 No.
- 698 7. **Does the dataset relate to people?** (If not, you may skip the remaining questions in this  
699 section.)  
700 No.
- 701 8. **Did you collect the data from the individuals in question directly, or obtain it via third**  
702 **parties or other sources (e.g., websites)?**  
703 N/A.

- 704 9. **Were the individuals in question notified about the data collection?** (If so, please  
705 describe (or show with screenshots or other information) how notice was provided, and  
706 provide a link or other access point to, or otherwise reproduce, the exact language of the  
707 notification itself.)  
708 N/A.
- 709 10. **Did the individuals in question consent to the collection and use of their data?** (If so,  
710 please describe (or show with screenshots or other information) how consent was requested  
711 and provided, and provide a link or other access point to, or otherwise reproduce, the exact  
712 language to which the individuals consented.)  
713 N/A.
- 714 11. **If consent was obtained, were the consenting individuals provided with a mechanism to  
715 revoke their consent in the future or for certain uses?** (If so, please provide a description,  
716 as well as a link or other access point to the mechanism (if appropriate).)  
717 N/A.
- 718 12. **Has an analysis of the potential impact of the dataset and its use on data subjects (e.g.,  
719 a data protection impact analysis) been conducted?** (If so, please provide a description of  
720 this analysis, including the outcomes, as well as a link or other access point to any supporting  
721 documentation.)  
722 N/A.
- 723 13. **Any other comments?**  
724 No.

#### 725 C.4 Preprocessing/cleaning/labeling

- 726 1. **Was any preprocessing/cleaning/labeling of the data done(e.g.,discretization or bucket-**  
727 **ing, tokenization, part-of-speech tagging, SIFT feature extraction, removal of instances,**  
728 **processing of missing values)?** (If so, please provide a description. If not, you may skip  
729 the remainder of the questions in this section.)  
730 Labelling of the resource composition and difficulty levels for each scenario was done  
731 automatically using a script, with the assigned value guided by string matching for the  
732 former, and Table. [A.4](#) for the latter. We also did multiple rounds of manual inspection of  
733 our data to ensure they were sound.
- 734 2. **Was the "raw" data saved in addition to the preprocessed/cleaned/labeled data (e.g., to  
735 support unanticipated future uses)?** (If so, please provide a link or other access point to  
736 the "raw" data.)  
737 Since our processing of the data left the raw data untouched (i.e., we only added additional  
738 columns), our raw data is present in our finalized dataset.
- 739 3. **Is the software used to preprocess/clean/label the instances available? (If so, please  
740 provide a link or other access point.)**  
741 Our labelling scripts are included in our GitHub repository: [https://github.com/autoiac-](https://github.com/autoiac-project/iac-eval)  
742 [project/iac-eval](https://github.com/autoiac-project/iac-eval)
- 743 4. **Any other comments?**  
744 No.

#### 745 C.5 Uses

- 746 1. **Has the dataset been used for any tasks already?** (If so, please provide a description.)  
747 Not at the moment.
- 748 2. **Is there a repository that links to any or all papers or systems that use the dataset?** (If  
749 so, please provide a link or other access point.)  
750 Not currently.

- 751 **3. What (other) tasks could the dataset be used for?**  
752 Apart from our envisioned evaluation use-case, we believe an expanded dataset could also  
753 be used for fine-tuning purposes. Finally, we welcome other innovative use-cases by the  
754 community!
- 755 **4. Is there anything about the composition of the dataset or the way it was collected and**  
756 **preprocessed/cleaned/labeled that might impact future uses?** (For example, is there  
757 anything that a future user might need to know to avoid uses that could result in unfair  
758 treatment of individuals or groups (e.g., stereotyping, quality of service issues) or other  
759 undesirable harms (e.g., financial harms, legal risks) If so, please provide a description. Is  
760 there anything a future user could do to mitigate these undesirable harms?)  
761 No.
- 762 **5. Are there tasks for which the dataset should not be used?** (If so, please provide a  
763 description.)  
764 No.
- 765 **6. Any other comments?**  
766 No.

## 767 C.6 Distribution

- 768 **1. Will the dataset be distributed to third parties outside of the entity (e.g., company,**  
769 **institution, organization) on behalf of which the dataset was created?** (If so, please  
770 provide a description.)  
771 Yes, the dataset is freely and publicly available and accessible.
- 772 **2. How will the dataset will be distributed (e.g., tarball on website, API, GitHub)?** (Does  
773 the dataset have a digital object identifier (DOI)?)  
774 The dataset is free for download by everyone. Links are available in the GitHub repos-  
775 itory: <https://github.com/autoiac-project/iac-eval>. The persistent DOI of the dataset is  
776 <https://doi.org/10.57967/hf/2400>.
- 777 **3. When will the dataset be distributed?**  
778 The first version of the dataset is distributed as of June 2024.
- 779 **4. Will the dataset be distributed under a copyright or other intellectual property (IP)**  
780 **license, and/or under applicable terms of use (ToU)?** (If so, please describe this license  
781 and/or ToU, and provide a link or other access point to, or otherwise reproduce, any relevant  
782 licensing terms or ToU, as well as any fees associated with these restrictions.)  
783 The dataset and our code are licensed under a CC-BY-4.0 and MIT license respectively.
- 784 **5. Have any third parties imposed IP-based or other restrictions on the data associated**  
785 **with the instances?** (If so, please describe these restrictions, and provide a link or other  
786 access point to, or otherwise reproduce, any relevant licensing terms, as well as any fees  
787 associated with these restrictions.)  
788 No.
- 789 **6. Do any export controls or other regulatory restrictions apply to the dataset or to**  
790 **individual instances?** (If so, please describe these restrictions, and provide a link or other  
791 access point to, or otherwise reproduce, any supporting documentation.)  
792 No.
- 793 **7. Any other comments?**  
794 No.

## 795 C.7 Maintenance

- 796 **1. Who is supporting/hosting/maintaining the dataset?**

797 The dataset is maintained by the research groups associated with the authors from the  
798 University of Michigan.

799 **2. How can the owner/curator/manager of the dataset be contacted (e.g., email address)?**

800 The manager of the dataset can be reached at patkon@umich.edu.

801 **3. Is there an erratum?** (If so, please provide a link or other access point.)

802 There is no erratum currently. However, if errors are encountered, a fresh version will be  
803 released at the same repositories aforementioned. The repository issue trackers will contain  
804 a history of such updates.

805 **4. Will the dataset be updated (e.g., to correct labeling errors, add new instances, delete  
806 instances)?** (If so, please describe how often, by whom, and how updates will be commu-  
807 nicated to users (e.g., mailing list, GitHub)?)

808 Same as above.

809 **5. If the dataset relates to people, are there applicable limits on the retention of the data  
810 associated with the instances (e.g., were individuals in question told that their data  
811 would be retained for a fixed period of time and then deleted)?** (If so, please describe  
812 these limits and explain how they will be enforced.)

813 N/A.

814 **6. Will older versions of the dataset continue to be supported/hosted/maintained?** (If so,  
815 please describe how. If not, please describe how its obsolescence will be communicated to  
816 users.)

817 Versioning of the dataset and benchmark will be maintained in the repositories.

818 **7. If others want to extend/augment/build on/contribute to the dataset, is there a mech-  
819 anism for them to do so?** (If so, please provide a description. Will these contributions  
820 be validated/verified? If so, please describe how. If not, why not? Is there a process  
821 for communicating/distributing these contributions to other users? If so, please provide a  
822 description.)

823 IaC-Eval is publicly available and anyone with the available compute resources, and an  
824 AWS account should be able to extend to our dataset. We welcome contributions from the  
825 community, as IaC-Eval is merely a first step in this direction!

826 **8. Any other comments?**

827 No.

828 **C.8 Reproducibility of IaC-Eval evaluation results**

829 The evaluation setup details and step-by-step instructions on reproducing our results are found in  
830 IaC-Eval’s GitHub repository: <https://github.com/autoiac-project/iac-eval>.

831 **C.9 Reading and using the dataset**

832 Our dataset (located in our HuggingFace repository) is in a standard CSV format. There is currently  
833 only one file, where we store all our AWS scenarios. Our evaluation benchmark and all relevant code  
834 and instructions are provided in our aforementioned GitHub repository.

835 **C.10 Data format**

836 The CSV file has the following columns: “Resource”, “Prompt”, “Intent”, “Rego intent”, “Difficulty”,  
837 and “Reference output”. An explanation of their intended use is provided in Table. [6](#) NL refers to  
838 natural language, while Rego [\[35\]](#) and HCL [\[50\]](#) are expressive declarative languages.

Table 6: IaC-Eval dataset columns

| <b>Column name</b> | <b>Descriptor</b>                                           | <b>Format</b> |
|--------------------|-------------------------------------------------------------|---------------|
| Resource           | All resources that this scenario requires.                  | NL            |
| Prompt             | User question to be fed to the LLM under evaluation.        | NL            |
| Rego intent        | Validates the generated program for user intent fulfilment. | Rego          |
| Difficulty         | Calculated difficulty level (Table. 4).                     | Integer       |
| Intent             | Natural language intent for easy viewing.                   | NL            |
| Reference output   | Example correct program.                                    | HCL           |
